# Supplementary material
Source: PubMed Central journal article supplement (PMC8513399)
Supplement: jiab425_suppl_Supplementary_Figure_S1.pdf [file jiab425_suppl_Supplementary_Figure_S1.pdf]

**Clinical data of COVID-19 severe acute patients included in the study**

| Patient | Gender | Age | Symptoms                                                                                                      | RT-qPCR (Swab) | Comorbidities                                                                   | D-dimer (µg/ml) | C-Reactive Protein (mg/dL) | Neutrophil/Lymphocyte (NLR) | Respiratory status     | Clinical classification | Hospitalization (Days) | Outcome            |
|---------|--------|-----|---------------------------------------------------------------------------------------------------------------|----------------|---------------------------------------------------------------------------------|-----------------|----------------------------|-----------------------------|------------------------|-------------------------|------------------------|--------------------|
| P#1     | Male   | 61  | Fever, Cough, Shortness of breath, Rash                                                                       | Positive       | Hypertension, Diabetes, Obesity, Rheumatoid arthritis                           | 2520            | 30.6                       | 21.75                       | Mechanical ventilation | Severe                  | 18                     | Death              |
| P#2     | Female | 70  | Acute viral nasopharyngitis, Nosebleed                                                                        | Positive       | Hypertension, Diabetes, Coronary disease, Acute myocardial infarction           | 4000            | 9.4                        | 15.45                       | Oxygen therapy         | Severe                  | 16                     | Death              |
| P#3     | Female | 73  | Headache                                                                                                      | Positive       | Hypertension, Diabetes, Obesity, Coronary disease                               | 2070            | 36.0                       | 138.12                      | Mechanical ventilation | Severe                  | 9                      | Death              |
| P#4     | Male   | 75  | Fever, Cough, Shortness of breath, Distress                                                                   | Positive       | Hypertension, Diabetes, Obesity, Coronary disease                               | 2090            | 42.0                       | 29.00                       | Mechanical ventilation | Severe                  | 198                    | Death              |
| P#5     | Male   | 84  | Fever, Cough, Shortness of breath, Distress, Diarrhea, Neurologic alterations, Altered state of consciousness | Positive       | Hypertension, Diabetes, Coronary disease, Chronic obstructive pulmonary disease | ND              | ND                         | ND                          | Oxygen therapy         | Severe                  | 7                      | Death              |
| P#6     | Female | 73  | Fever, Cough, Acute viral nasopharyngitis, Shortness of breath                                                | Positive       | Hypertension, Diabetes                                                          | 690             | 47.9                       | 3.60                        | Mechanical ventilation | Severe                  | 31                     | Death              |
| P#7     | Female | 86  | Shortness of breath, Altered state of consciousness, Muscle/joint pain                                        | Positive       | Hypertension, Diabetes, Obesity, Coronary disease, Kidney disease               | 8650            | 25.8                       | 13.30                       | Mechanical ventilation | Severe                  | 44                     | Death              |
| P#8     | Female | 71  | Cough, Shortness of breath, Diarrhea                                                                          | Positive       | Leukemia, Cardiomegaly                                                          | 3990            | 40.5                       | 1.02                        | Mechanical ventilation | Severe                  | 20                     | Death              |
| P#9     | Female | 55  | Fever, Cough, Acute viral nasopharyngitis, Shortness of breath                                                | Positive       | Hypertension, Obesity                                                           | 11000           | 13.5                       | 4.29                        | Mechanical ventilation | Severe                  | 50                     | Hospital discharge |
| P#10    | Male   | 72  | Fever, Cough, Smell and/or taste loss, Shortness of breath, Distress, Muscle/joint pain                       | Positive       | Hypertension, Diabetes, Obesity, Coronary disease                               | 1610            | 46.1                       | 16.4                        | Oxygen therapy         | Severe                  | 19                     | Death              |
| P#11    | Male   | 64  | Fever, Cough, Fatigue, Headache, Muscle/joint pain                                                            | Positive       | Hypertension, Obesity                                                           | 1590            | 19.9                       | 11.30                       | Oxygen therapy         | Severe                  | 10                     | Death              |
| P#12    | Male   | 63  | Fever, Nausea, Cough, Shortness of breath, Diarrhea, Muscle/joint pain                                        | Positive       | Hypertension                                                                    | ND              | ND                         | ND                          | Mechanical ventilation | Severe                  | 89                     | Hospital discharge |
| P#13    | Female | 77  | Fever, Cough                                                                                                  | Positive       | Hypertension, Obesity                                                           | 1510            | 18.2                       | 3.45                        | Mechanical ventilation | Severe                  | 7                      | Death              |
| P#14    | Male   | 76  | Shortness of breath, Fatigue, Muscle/joint pain                                                               | Positive       | Hypertension, Diabetes, Cancer, Coronary disease,                               | ND              | ND                         | ND                          | Mechanical ventilation | Severe                  | 30                     | Death              |
| P#15    | Female | 81  | Shortness of breath, Altered state of consciousness                                                           | Positive       | Hypertension, Diabetes, Obesity                                                 | ND              | 8.8                        | 4.22                        | Oxygen therapy         | Severe                  | 36                     | Death              |
| P#16    | Male   | 49  | Fever, Cough, Headache, Diarrhea, Shortness of breath                                                         | Positive       | Hypertension, Diabetes, Obesity                                                 | 885             | 17.8                       | 1.80                        | Mechanical ventilation | Severe                  | 35                     | Death              |
| P#17    | Male   | 93  | Shortness of breath                                                                                           | Positive       | Prostatic hyperplasia                                                           | ND              | 22.8                       | 14.33                       | Mechanical ventilation | Severe                  | 1                      | Death              |
| P#18    | Female | 55  | Fever, Cough, Acute viral nasopharyngitis, Muscle/joint pain, Acute kidney failure                            | Positive       | Hypertension, Diabetes, Obesity                                                 | 11000           | 13.5                       | 4.29                        | Mechanical ventilation | Severe                  | 50                     | Hospital discharge |
| P#19    | Male   | 67  | Fever, Smell and/or taste loss, Shortness of breath                                                           | Positive       | Diabetes, Prostate cancer                                                       | 1180            | 41.0                       | 17.20                       | Mechanical ventilation | Severe                  | 71                     | Hospital discharge |
| P#20    | Female | 64  | Acute viral nasopharyngitis, Altered state of consciousness, Distress, Muscle/joint pain                      | Positive       | Hypertension                                                                    | 2670            | 27.4                       | 15.20                       | Mechanical ventilation | Severe                  | NI                     | Death              |
| P#21    | Male   | 59  | Fever, Cough, Headache, Shortness of breath, Muscle/joint pain                                                | Positive       | Hypertension, Diabetes, Emphysema, Bronchitis, Asthma                           | 885             | 39.7                       | 5.50                        | Mechanical ventilation | Severe                  | 9                      | Death              |
| P#22    | Female | 18  | Fever, Cough, Shortness of breath                                                                             | Positive       | Obesity                                                                         | ND              | 9.8                        | 8.77                        | Mechanical ventilation | Severe                  | 11                     | Hospital discharge |
